# Supplementary material for: Segmentation of Tricuspid Valve Leaflets From Transthoracic 3D Echocardiograms of Children With Hypoplastic Left Heart Syndrome Using Deep Learning
Source: Front Cardiovasc Med. 2021 Dec 9;8:735587. doi: 10.3389/fcvm.2021.735587 (PMC8696083; doi:10.3389/fcvm.2021.735587)
Supplement: Supplementary file 2 [file Table_2.XLSX]

## Sheet: pre-stage1
Table S17. Ranking of FCN variants with Input Image(s) only at pre-stage 1 repair. Values are presented as mean leaflet MBD (rank). The rank was calculated across all FCN variants used on the same case (row) ranging from 1 (best) to 8 (worst). The bottom row shows the average rank across all cases for individual FCN variants. The best ranked FCN variant has the lowest average rank.
Case	FCN
	(CSP) Im-Only	(Single-Phase) Im-Only	(Two-Phase) Im-Only-Res	(CSP) Im-Only-Res	(Four-Phase) Im-Only-Res	(Single-Phase) Im-Only-Res	(Two-Phase) Im-Only	(Four-Phase) Im-Only
14	0.769 (4)	0.855 (7)	0.556 (2)	0.706 (3)	0.984 (8)	0.814 (6)	0.778 (5)	0.533 (1)
16	0.653 (3)	0.765 (7)	0.638 (2)	0.751 (6)	0.726 (4)	0.789 (8)	0.750 (5)	0.524 (1)
17	0.681 (6)	0.634 (4)	0.428 (1)	0.544 (3)	0.646 (5)	0.764 (8)	0.524 (2)	0.736 (7)
23	0.630 (2)	0.794 (8)	0.676 (4)	0.748 (6)	0.529 (1)	0.642 (3)	0.683 (5)	0.764 (7)
25	0.590 (5)	0.494 (3)	0.594 (6)	0.854 (8)	0.568 (4)	0.625 (7)	0.466 (2)	0.460 (1)
26	0.511 (7)	0.627 (8)	0.356 (2)	0.396 (3)	0.341 (1)	0.406 (4)	0.494 (6)	0.416 (5)
27	0.515 (1)	0.655 (6)	0.841 (7)	0.555 (3)	0.578 (5)	0.563 (4)	0.552 (2)	0.916 (8)
Average Rank:	4.00	6.14	3.43	4.57	4.00	5.71	3.86	4.29
Table S18. Ranking of FCN configurations Using Annular Curve Input at pre-stage 1 repair. Values are presented as mean leaflet MBD (rank). The rank was calculated across all FCN variants used on the same case (row) ranging from 1 (best) to 8 (worst). The bottom row shows the average rank across all cases for individual FCN variants. The best ranked FCN variant has the lowest average rank.
Case	FCN
	(Two-Phase) Ann-Res	(Four-Phase) Ann-Res	(Single-Phase) Ann-Res	(Two-Phase) Ann-Res	(CSP) Ann-Res	(Four-Phase) Ann-Res	(Single-Phase) Ann-Res	(CSP) Ann-Res
14	0.631 (6)	0.570 (5)	0.677 (8)	0.501 (1)	0.507 (2)	0.548 (3)	0.559 (4)	0.663 (7)
16	0.545 (4)	0.541 (3)	0.683 (6)	0.572 (5)	0.492 (2)	0.440 (1)	0.780 (8)	0.710 (7)
17	0.372 (2)	0.594 (4)	0.768 (8)	0.306 (1)	0.549 (3)	0.609 (5)	0.643 (7)	0.632 (6)
23	0.425 (2)	0.365 (1)	0.473 (5)	0.457 (3)	0.468 (4)	0.666 (8)	0.492 (6)	0.626 (7)
25	0.363 (4)	0.567 (7)	0.516 (5)	0.280 (1)	0.351 (3)	0.300 (2)	0.516 (6)	0.702 (8)
26	0.510 (7)	0.538 (8)	0.457 (6)	0.406 (4)	0.240 (1)	0.324 (3)	0.256 (2)	0.432 (5)
27	0.569 (4)	0.623 (6)	0.683 (7)	0.383 (1)	0.407 (2)	0.501 (3)	0.579 (5)	0.710 (8)
Average Rank:	4.14	4.86	6.43	2.29	2.43	3.57	5.43	6.86
Table S19. Ranking of FCN configurations Using The Commissural Landmarks only at pre-stage 1 repair.Values are presented as mean leaflet MBD (rank). The rank was calculated across all FCN variants used on the same case (row) ranging from 1 (best) to 8 (worst). The bottom row shows the average rank across all cases for individual FCN variants. The best ranked FCN variant has the lowest average ran…
Case	FCN
	(Four-Phase) Com-Res	(Single-Phase) Com-Res	(Two-Phase) Com	(CSP) Com	(Four-Phase) Com	(Single-Phase) Com	(Two-Phase) Com-Res	(CSP) Com-Res
14	0.298 (4)	0.211 (1)	0.570 (8)	0.525 (7)	0.440 (5)	0.465 (6)	0.294 (3)	0.238 (2)
16	0.603 (6)	0.501 (2)	0.609 (7)	0.579 (5)	0.517 (3)	0.662 (8)	0.557 (4)	0.482 (1)
17	0.362 (3)	0.325 (2)	0.475 (5)	0.492 (7)	0.484 (6)	0.535 (8)	0.399 (4)	0.257 (1)
23	0.362 (3)	0.330 (2)	0.756 (8)	0.460 (6)	0.501 (7)	0.419 (5)	0.316 (1)	0.378 (4)
25	0.607 (7)	0.301 (1)	0.496 (6)	0.648 (8)	0.398 (4)	0.394 (3)	0.372 (2)	0.459 (5)
26	0.434 (5)	0.303 (1)	0.470 (7)	0.517 (8)	0.313 (2)	0.365 (4)	0.449 (6)	0.356 (3)
27	0.365 (6)	0.219 (1)	0.326 (4)	0.471 (8)	0.458 (7)	0.314 (3)	0.251 (2)	0.329 (5)
Average Rank:	4.86	1.43	6.43	7.00	4.86	5.29	3.14	3.00
Table S20. Ranking of FCN configurations Using Annular Curve Input and Commissural Landmarks at pre-stage 1 repair.Values are presented as mean leaflet MBD (rank). The rank was calculated across all FCN variants used on the same case (row) ranging from 1 (best) to 8 (worst). The bottom row shows the average rank across all cases for individual FCN variants. The best ranked FCN variant has the low…
Case	FCN
	(Two-Phase) Ann-Com	(CSP) Ann-Com	(Four-Phase) Ann-Com	(Single-Phase) Ann-Com	(Two-Phase) Ann-Com-Res	(CSP) Ann-Com-Res	(Four-Phase) Ann-Com-Res	(Single-Phase) Ann-Com-Res
14	0.344 (5)	0.352 (6)	0.410 (7)	0.424 (8)	0.308 (4)	0.199 (1)	0.201 (2)	0.202 (3)
16	0.491 (5)	0.475 (4)	0.387 (1)	0.585 (8)	0.521 (7)	0.497 (6)	0.449 (2)	0.460 (3)
17	0.292 (4)	0.284 (2)	0.324 (8)	0.296 (5)	0.291 (3)	0.227 (1)	0.299 (6)	0.318 (7)
23	0.245 (2)	0.353 (6)	0.472 (8)	0.370 (7)	0.278 (3)	0.337 (5)	0.293 (4)	0.212 (1)
25	0.369 (7)	0.304 (5)	0.329 (6)	0.565 (8)	0.278 (4)	0.226 (2)	0.231 (3)	0.226 (1)
26	0.376 (8)	0.303 (6)	0.253 (5)	0.321 (7)	0.202 (1)	0.226 (4)	0.219 (3)	0.210 (2)
27	0.206 (3)	0.212 (5)	0.372 (7)	0.446 (8)	0.211 (4)	0.183 (1)	0.235 (6)	0.206 (2)
Average Rank:	4.86	4.86	6.00	7.29	3.71	2.86	3.71	2.71

## Sheet: stage1
Table S21. Ranking of FCN variants with Input Image(s) only at post-stage 1 repair. Values are presented as mean leaflet MBD (rank). The rank was calculated across all FCN variants used on the same case (row) ranging from 1 (best) to 8 (worst). The bottom row shows the average rank across all cases for individual FCN variants. The best ranked FCN variant has the lowest average rank.
Case	FCN
	(CSP) Im-Only	(Single-Phase) Im-Only	(Two-Phase) Im-Only-Res	(CSP) Im-Only-Res	(Four-Phase) Im-Only-Res	(Single-Phase) Im-Only-Res	(Two-Phase) Im-Only	(Four-Phase) Im-Only
2	0.495 (1)	0.644 (5)	0.795 (7)	0.549 (2)	0.791 (6)	0.805 (8)	0.559 (3)	0.605 (4)
5	0.598 (1)	0.887 (5)	1.283 (8)	0.950 (6)	0.705 (2)	1.218 (7)	0.854 (4)	0.719 (3)
9	0.603 (7)	0.477 (5)	0.484 (6)	0.311 (1)	0.346 (2)	0.659 (8)	0.349 (3)	0.404 (4)
10	0.822 (8)	0.564 (3)	0.487 (1)	0.633 (4)	0.655 (5)	0.683 (6)	0.553 (2)	0.697 (7)
11	1.855 (3)	2.546 (6)	2.714 (7)	1.858 (4)	2.091 (5)	1.820 (2)	1.579 (1)	2.794 (8)
12	0.801 (4)	0.689 (3)	1.106 (8)	0.411 (1)	0.870 (6)	0.654 (2)	0.835 (5)	0.925 (7)
15	1.261 (4)	2.071 (8)	1.009 (1)	1.270 (5)	1.177 (3)	1.157 (2)	1.822 (7)	1.504 (6)
Average Rank:	4.00	5.00	5.43	3.29	4.14	5.00	3.57	5.57
Table S22. Ranking of FCN configurations Using Annular Curve Input at post-stage 1 repair. Values are presented as mean leaflet MBD (rank). The rank was calculated across all FCN variants used on the same case (row) ranging from 1 (best) to 8 (worst). The bottom row shows the average rank across all cases for individual FCN variants. The best ranked FCN variant has the lowest average rank.
Case	FCN
	(Two-Phase) Ann-Res	(Four-Phase) Ann-Res	(Single-Phase) Ann-Res	(Two-Phase) Ann-Res	(CSP) Ann-Res	(Four-Phase) Ann-Res	(Single-Phase) Ann-Res	(CSP) Ann-Res
2	0.522 (3)	0.457 (1)	0.604 (5)	0.499 (2)	0.589 (4)	0.611 (7)	0.608 (6)	0.642 (8)
5	0.783 (8)	0.718 (7)	0.714 (6)	0.488 (3)	0.435 (1)	0.440 (2)	0.567 (5)	0.496 (4)
9	0.305 (4)	0.355 (5)	0.491 (8)	0.256 (1)	0.290 (2)	0.296 (3)	0.383 (6)	0.405 (7)
10	0.362 (1)	0.434 (3)	0.627 (8)	0.471 (6)	0.404 (2)	0.534 (7)	0.467 (5)	0.457 (4)
11	1.337 (3)	1.435 (5)	1.639 (7)	0.949 (1)	1.142 (2)	1.523 (6)	1.402 (4)	1.869 (8)
12	0.640 (7)	0.611 (6)	0.656 (8)	0.464 (3)	0.366 (1)	0.513 (4)	0.402 (2)	0.576 (5)
15	1.014 (8)	0.903 (6)	0.786 (3)	0.856 (5)	0.610 (1)	0.790 (4)	0.664 (2)	0.914 (7)
Average Rank:	4.86	4.71	6.43	3.00	1.86	4.71	4.29	6.14
Table S23. Ranking of FCN configurations Using The Commissural Landmarks only at post-stage 1 repair.Values are presented as mean leaflet MBD (rank). The rank was calculated across all FCN variants used on the same case (row) ranging from 1 (best) to 8 (worst). The bottom row shows the average rank across all cases for individual FCN variants. The best ranked FCN variant has the lowest average ra…
Case	FCN
	(Four-Phase) Com-Res	(Single-Phase) Com-Res	(Two-Phase) Com	(CSP) Com	(Four-Phase) Com	(Single-Phase) Com	(Two-Phase) Com-Res	(CSP) Com-Res
2	0.451 (2)	0.477 (3)	0.535 (6)	0.520 (5)	0.481 (4)	0.447 (1)	0.565 (8)	0.554 (7)
5	0.616 (4)	0.518 (1)	0.638 (5)	0.728 (8)	0.663 (6)	0.685 (7)	0.544 (2)	0.586 (3)
9	0.299 (7)	0.209 (1)	0.267 (5)	0.319 (8)	0.246 (3)	0.253 (4)	0.219 (2)	0.292 (6)
10	0.564 (4)	0.623 (7)	1.172 (8)	0.442 (2)	0.419 (1)	0.486 (3)	0.604 (6)	0.569 (5)
11	1.235 (5)	0.726 (1)	2.788 (8)	2.327 (7)	1.079 (4)	0.984 (3)	1.340 (6)	0.843 (2)
12	0.460 (3)	0.436 (2)	0.731 (7)	0.760 (8)	0.553 (5)	0.622 (6)	0.352 (1)	0.473 (4)
15	0.899 (2)	1.140 (5)	1.015 (4)	1.613 (8)	1.590 (7)	1.163 (6)	0.970 (3)	0.794 (1)
Average Rank:	3.86	2.86	6.14	6.57	4.29	4.29	4.00	4.00
Table S24. Ranking of FCN configurations Using Annular Curve Input and Commissural Landmarks at post-stage 1 repair.Values are presented as mean leaflet MBD (rank). The rank was calculated across all FCN variants used on the same case (row) ranging from 1 (best) to 8 (worst). The bottom row shows the average rank across all cases for individual FCN variants. The best ranked FCN variant has the lo…
Case	FCN
	(Two-Phase) Ann-Com	(CSP) Ann-Com	(Four-Phase) Ann-Com	(Single-Phase) Ann-Com	(Two-Phase) Ann-Com-Res	(CSP) Ann-Com-Res	(Four-Phase) Ann-Com-Res	(Single-Phase) Ann-Com-Res
2	0.581 (6)	0.678 (8)	0.543 (5)	0.597 (7)	0.482 (1)	0.517 (3)	0.533 (4)	0.510 (2)
5	0.456 (4)	0.399 (1)	0.546 (7)	0.625 (8)	0.439 (3)	0.461 (5)	0.462 (6)	0.419 (2)
9	0.241 (6)	0.217 (2)	0.312 (7)	0.314 (8)	0.225 (3)	0.225 (4)	0.185 (1)	0.235 (5)
10	0.316 (1)	0.389 (5)	0.380 (4)	0.375 (3)	0.484 (8)	0.340 (2)	0.412 (6)	0.431 (7)
11	1.061 (5)	1.010 (4)	1.158 (6)	1.171 (7)	1.260 (8)	0.756 (2)	0.683 (1)	1.003 (3)
12	0.383 (5)	0.582 (8)	0.402 (6)	0.505 (7)	0.241 (1)	0.303 (3)	0.335 (4)	0.272 (2)
15	0.826 (8)	0.718 (6)	0.735 (7)	0.664 (5)	0.627 (3)	0.543 (1)	0.609 (2)	0.630 (4)
Average Rank:	5.00	4.86	6.00	6.43	3.86	2.86	3.43	3.57

## Sheet: stage2
Table S25. Ranking of FCN variants with Input Image(s) only at post-stage 2 repair. Values are presented as mean leaflet MBD (rank). The rank was calculated across all FCN variants used on the same case (row) ranging from 1 (best) to 8 (worst). The bottom row shows the average rank across all cases for individual FCN variants. The best ranked FCN variant has the lowest average rank.
Case	FCN
	(CSP) Im-Only	(Single-Phase) Im-Only	(Two-Phase) Im-Only-Res	(CSP) Im-Only-Res	(Four-Phase) Im-Only-Res	(Single-Phase) Im-Only-Res	(Two-Phase) Im-Only	(Four-Phase) Im-Only
1	1.271 (6)	1.213 (5)	0.874 (1)	1.103 (3)	0.988 (2)	1.511 (8)	1.147 (4)	1.307 (7)
3	0.803 (6)	0.741 (4)	0.746 (5)	0.560 (1)	0.695 (3)	0.635 (2)	0.963 (7)	1.099 (8)
4	1.106 (3)	1.205 (7)	1.224 (8)	0.723 (1)	1.194 (6)	1.182 (5)	1.117 (4)	0.798 (2)
6	1.007 (5)	1.021 (6)	0.845 (2)	0.714 (1)	0.903 (3)	0.985 (4)	1.685 (8)	1.083 (7)
7	0.694 (4)	0.820 (7)	0.821 (8)	0.689 (3)	0.606 (2)	0.759 (6)	0.517 (1)	0.720 (5)
8	0.710 (3)	1.014 (8)	0.630 (1)	0.737 (5)	0.725 (4)	0.801 (6)	0.644 (2)	0.985 (7)
13	1.153 (3)	1.542 (6)	1.580 (7)	1.063 (2)	1.021 (1)	1.268 (4)	2.981 (8)	1.417 (5)
Average Rank:	4.29	6.14	4.57	2.29	3.00	5.00	4.86	5.86
Table S26. Ranking of FCN configurations Using Annular Curve Input at post-stage 2 repair. Values are presented as mean leaflet MBD (rank). The rank was calculated across all FCN variants used on the same case (row) ranging from 1 (best) to 8 (worst). The bottom row shows the average rank across all cases for individual FCN variants. The best ranked FCN variant has the lowest average rank.
Case	FCN
	(Two-Phase) Ann-Res	(Four-Phase) Ann-Res	(Single-Phase) Ann-Res	(Two-Phase) Ann-Res	(CSP) Ann-Res	(Four-Phase) Ann-Res	(Single-Phase) Ann-Res	(CSP) Ann-Res
1	0.845 (5)	1.199 (8)	1.168 (7)	0.665 (3)	0.640 (1)	0.840 (4)	0.641 (2)	0.879 (6)
3	0.608 (2)	0.916 (8)	0.809 (5)	0.870 (7)	0.673 (4)	0.664 (3)	0.589 (1)	0.826 (6)
4	1.344 (7)	1.416 (8)	1.123 (4)	1.229 (5)	0.993 (1)	1.039 (3)	1.341 (6)	1.029 (2)
6	0.890 (8)	0.730 (5)	0.812 (7)	0.680 (4)	0.638 (3)	0.623 (2)	0.738 (6)	0.598 (1)
7	0.708 (5)	0.644 (4)	0.634 (3)	0.760 (8)	0.728 (6)	0.532 (1)	0.754 (7)	0.601 (2)
8	0.797 (6)	0.671 (5)	0.839 (7)	0.535 (2)	0.448 (1)	0.597 (4)	0.561 (3)	0.851 (8)
13	1.514 (7)	1.146 (5)	1.106 (3)	1.032 (2)	0.759 (1)	1.257 (6)	1.832 (8)	1.145 (4)
Average Rank:	5.71	6.14	5.14	4.43	2.43	3.29	4.71	4.14
Table S27. Ranking of FCN configurations Using The Commissural Landmarks only at post-stage 2 repair.Values are presented as mean leaflet MBD (rank). The rank was calculated across all FCN variants used on the same case (row) ranging from 1 (best) to 8 (worst). The bottom row shows the average rank across all cases for individual FCN variants. The best ranked FCN variant has the lowest average ra…
Case	FCN
	(Four-Phase) Com-Res	(Single-Phase) Com-Res	(Two-Phase) Com	(CSP) Com	(Four-Phase) Com	(Single-Phase) Com	(Two-Phase) Com-Res	(CSP) Com-Res
1	0.765 (3)	0.702 (2)	1.369 (8)	0.961 (7)	0.949 (6)	0.836 (4)	0.692 (1)	0.888 (5)
3	0.666 (4)	0.553 (1)	0.963 (8)	0.933 (7)	0.880 (6)	0.600 (3)	0.597 (2)	0.757 (5)
4	0.920 (8)	0.600 (3)	0.815 (6)	0.811 (5)	0.751 (4)	0.873 (7)	0.591 (2)	0.567 (1)
6	0.724 (3)	0.642 (1)	1.231 (8)	0.761 (4)	1.155 (7)	0.806 (6)	0.701 (2)	0.769 (5)
7	0.544 (6)	0.468 (1)	0.688 (8)	0.595 (7)	0.522 (4)	0.500 (3)	0.483 (2)	0.542 (5)
8	0.740 (6)	0.554 (1)	0.664 (4)	0.894 (8)	0.823 (7)	0.598 (3)	0.577 (2)	0.679 (5)
13	0.523 (1)	0.810 (6)	2.141 (8)	1.071 (7)	0.651 (4)	0.731 (5)	0.612 (3)	0.527 (2)
Average Rank:	4.43	2.14	7.14	6.43	5.43	4.43	2.00	4.00
Table S28. Ranking of FCN configurations Using Annular Curve Input and Commissural Landmarks at post-stage 2 repair.Values are presented as mean leaflet MBD (rank). The rank was calculated across all FCN variants used on the same case (row) ranging from 1 (best) to 8 (worst). The bottom row shows the average rank across all cases for individual FCN variants. The best ranked FCN variant has the lo…
Case	FCN
	(Two-Phase) Ann-Com	(CSP) Ann-Com	(Four-Phase) Ann-Com	(Single-Phase) Ann-Com	(Two-Phase) Ann-Com-Res	(CSP) Ann-Com-Res	(Four-Phase) Ann-Com-Res	(Single-Phase) Ann-Com-Res
1	0.592 (5)	0.612 (7)	0.598 (6)	0.692 (8)	0.479 (4)	0.434 (2)	0.448 (3)	0.403 (1)
3	0.610 (6)	0.586 (5)	0.626 (7)	0.546 (4)	0.503 (2)	0.492 (1)	0.507 (3)	0.888 (8)
4	0.461 (1)	0.503 (4)	0.633 (6)	0.716 (8)	0.638 (7)	0.470 (2)	0.505 (5)	0.483 (3)
6	0.564 (6)	0.495 (5)	0.656 (7)	0.698 (8)	0.375 (2)	0.397 (3)	0.349 (1)	0.480 (4)
7	0.525 (8)	0.441 (5)	0.520 (7)	0.485 (6)	0.395 (3)	0.366 (1)	0.393 (2)	0.437 (4)
8	0.602 (5)	0.699 (7)	0.607 (6)	0.770 (8)	0.506 (4)	0.422 (2)	0.442 (3)	0.391 (1)
13	0.605 (5)	0.553 (4)	0.698 (6)	0.880 (7)	1.551 (8)	0.415 (1)	0.457 (2)	0.545 (3)
Average Rank:	5.14	5.29	6.43	7.00	4.29	1.71	2.71	3.43

## Sheet: stage3
Table S29. Ranking of FCN variants with Input Image(s) only at post-stage 3 repair. Values are presented as mean leaflet MBD (rank). The rank was calculated across all FCN variants used on the same case (row) ranging from 1 (best) to 8 (worst). The bottom row shows the average rank across all cases for individual FCN variants. The best ranked FCN variant has the lowest average rank.
Case	FCN
	(CSP) Im-Only	(Single-Phase) Im-Only	(Two-Phase) Im-Only-Res	(CSP) Im-Only-Res	(Four-Phase) Im-Only-Res	(Single-Phase) Im-Only-Res	(Two-Phase) Im-Only	(Four-Phase) Im-Only
0	0.976 (1)	1.328 (5)	1.371 (6)	1.381 (7)	1.289 (4)	1.475 (8)	1.236 (3)	1.059 (2)
18	1.650 (5)	2.072 (8)	1.099 (1)	1.329 (2)	1.903 (7)	1.458 (4)	1.368 (3)	1.837 (6)
19	0.580 (1)	0.772 (2)	1.407 (6)	1.610 (8)	0.886 (3)	1.000 (5)	1.528 (7)	0.887 (4)
20	1.434 (7)	1.589 (8)	0.914 (3)	0.914 (4)	1.007 (5)	1.028 (6)	0.748 (1)	0.775 (2)
21	0.885 (5)	0.774 (1)	0.829 (3)	0.953 (7)	0.922 (6)	0.864 (4)	1.126 (8)	0.816 (2)
22	1.636 (4)	1.697 (5)	1.513 (3)	1.811 (8)	1.767 (6)	1.256 (1)	1.500 (2)	1.807 (7)
24	0.591 (2)	0.816 (7)	0.705 (3)	1.334 (8)	0.729 (6)	0.589 (1)	0.709 (4)	0.726 (5)
Average Rank:	3.57	5.14	3.57	6.29	5.29	4.14	4.00	4.00
Table S30. Ranking of FCN configurations Using Annular Curve Input at post-stage 3 repair. Values are presented as mean leaflet MBD (rank). The rank was calculated across all FCN variants used on the same case (row) ranging from 1 (best) to 8 (worst). The bottom row shows the average rank across all cases for individual FCN variants. The best ranked FCN variant has the lowest average rank.
Case	FCN
	(Two-Phase) Ann-Res	(Four-Phase) Ann-Res	(Single-Phase) Ann-Res	(Two-Phase) Ann-Res	(CSP) Ann-Res	(Four-Phase) Ann-Res	(Single-Phase) Ann-Res	(CSP) Ann-Res
0	1.132 (5)	1.131 (4)	0.920 (1)	1.145 (6)	1.005 (3)	0.995 (2)	1.316 (8)	1.158 (7)
18	0.702 (4)	1.046 (6)	1.691 (8)	0.525 (2)	0.595 (3)	1.040 (5)	0.507 (1)	1.177 (7)
19	1.425 (8)	0.916 (6)	0.716 (3)	1.393 (7)	0.678 (2)	0.451 (1)	0.877 (5)	0.870 (4)
20	0.532 (2)	0.789 (5)	1.199 (8)	0.450 (1)	0.656 (3)	0.776 (4)	0.832 (7)	0.803 (6)
21	0.729 (3)	0.752 (4)	0.825 (5)	0.641 (1)	0.886 (7)	0.936 (8)	0.694 (2)	0.837 (6)
22	0.803 (1)	1.084 (3)	1.334 (5)	0.933 (2)	1.250 (4)	1.353 (7)	1.338 (6)	1.407 (8)
24	0.831 (6)	0.872 (7)	0.891 (8)	0.734 (4)	0.768 (5)	0.595 (2)	0.538 (1)	0.697 (3)
Average Rank:	4.14	5.00	5.43	3.29	3.86	4.14	4.29	5.86
Table S31. Ranking of FCN configurations Using The Commissural Landmarks only at post-stage 3 repair.Values are presented as mean leaflet MBD (rank). The rank was calculated across all FCN variants used on the same case (row) ranging from 1 (best) to 8 (worst). The bottom row shows the average rank across all cases for individual FCN variants. The best ranked FCN variant has the lowest average ra…
Case	FCN
	(Four-Phase) Com-Res	(Single-Phase) Com-Res	(Two-Phase) Com	(CSP) Com	(Four-Phase) Com	(Single-Phase) Com	(Two-Phase) Com-Res	(CSP) Com-Res
0	0.987 (6)	0.947 (4)	0.951 (5)	1.198 (8)	1.095 (7)	0.817 (1)	0.876 (2)	0.901 (3)
18	0.611 (4)	0.511 (2)	1.571 (8)	1.107 (7)	1.071 (6)	0.940 (5)	0.558 (3)	0.452 (1)
19	0.990 (8)	0.662 (5)	0.892 (7)	0.505 (1)	0.618 (4)	0.726 (6)	0.546 (3)	0.544 (2)
20	0.655 (6)	0.370 (1)	0.577 (5)	0.694 (8)	0.658 (7)	0.454 (4)	0.389 (2)	0.405 (3)
21	0.628 (3)	0.515 (1)	0.865 (7)	0.899 (8)	0.660 (4)	0.723 (6)	0.661 (5)	0.578 (2)
22	1.873 (8)	0.557 (1)	1.141 (6)	0.928 (5)	1.226 (7)	0.862 (4)	0.773 (3)	0.707 (2)
24	0.662 (5)	0.579 (3)	0.775 (8)	0.565 (2)	0.716 (7)	0.689 (6)	0.613 (4)	0.423 (1)
Average Rank:	5.71	2.43	6.57	5.57	6.00	4.57	3.14	2.00
Table S32. Ranking of FCN configurations Using Annular Curve Input and Commissural Landmarks at post-stage 3 repair.Values are presented as mean leaflet MBD (rank). The rank was calculated across all FCN variants used on the same case (row) ranging from 1 (best) to 8 (worst). The bottom row shows the average rank across all cases for individual FCN variants. The best ranked FCN variant has the lo…
Case	FCN
	(Two-Phase) Ann-Com	(CSP) Ann-Com	(Four-Phase) Ann-Com	(Single-Phase) Ann-Com	(Two-Phase) Ann-Com-Res	(CSP) Ann-Com-Res	(Four-Phase) Ann-Com-Res	(Single-Phase) Ann-Com-Res
0	0.545 (5)	0.711 (6)	0.838 (7)	0.936 (8)	0.537 (4)	0.529 (3)	0.403 (2)	0.393 (1)
18	0.666 (6)	0.541 (5)	0.781 (8)	0.728 (7)	0.327 (3)	0.298 (1)	0.316 (2)	0.362 (4)
19	0.534 (6)	0.756 (8)	0.627 (7)	0.502 (5)	0.396 (3)	0.436 (4)	0.341 (2)	0.326 (1)
20	0.391 (6)	0.408 (7)	0.379 (5)	0.424 (8)	0.334 (3)	0.341 (4)	0.248 (1)	0.285 (2)
21	0.434 (3)	0.435 (4)	0.568 (8)	0.547 (7)	0.483 (6)	0.301 (1)	0.436 (5)	0.365 (2)
22	0.576 (5)	0.640 (6)	0.760 (8)	0.650 (7)	0.467 (3)	0.403 (2)	0.489 (4)	0.370 (1)
24	0.671 (8)	0.509 (5)	0.652 (7)	0.551 (6)	0.408 (4)	0.341 (2)	0.384 (3)	0.305 (1)
Average Rank:	5.57	5.86	7.14	6.86	3.71	2.43	2.71	1.71

## Sheet: all_stages
Table S33. Ranking of FCN variants with Input Image(s) only at all stages of repair combined. Values are presented as mean leaflet MBD (rank). The rank was calculated across all FCN variants used on the same case (row) ranging from 1 (best) to 8 (worst). The bottom row shows the average rank across all cases for individual FCN variants. The best ranked FCN variant has the lowest average rank.
Case	FCN
	(CSP) Im-Only	(Single-Phase) Im-Only	(Two-Phase) Im-Only-Res	(CSP) Im-Only-Res	(Four-Phase) Im-Only-Res	(Single-Phase) Im-Only-Res	(Two-Phase) Im-Only	(Four-Phase) Im-Only
0	0.976 (1)	1.328 (5)	1.371 (6)	1.381 (7)	1.289 (4)	1.475 (8)	1.236 (3)	1.059 (2)
1	1.271 (6)	1.213 (5)	0.874 (1)	1.103 (3)	0.988 (2)	1.511 (8)	1.147 (4)	1.307 (7)
2	0.495 (1)	0.644 (5)	0.795 (7)	0.549 (2)	0.791 (6)	0.805 (8)	0.559 (3)	0.605 (4)
3	0.803 (6)	0.741 (4)	0.746 (5)	0.560 (1)	0.695 (3)	0.635 (2)	0.963 (7)	1.099 (8)
4	1.106 (3)	1.205 (7)	1.224 (8)	0.723 (1)	1.194 (6)	1.182 (5)	1.117 (4)	0.798 (2)
5	0.598 (1)	0.887 (5)	1.283 (8)	0.950 (6)	0.705 (2)	1.218 (7)	0.854 (4)	0.719 (3)
6	1.007 (5)	1.021 (6)	0.845 (2)	0.714 (1)	0.903 (3)	0.985 (4)	1.685 (8)	1.083 (7)
7	0.694 (4)	0.820 (7)	0.821 (8)	0.689 (3)	0.606 (2)	0.759 (6)	0.517 (1)	0.720 (5)
8	0.710 (3)	1.014 (8)	0.630 (1)	0.737 (5)	0.725 (4)	0.801 (6)	0.644 (2)	0.985 (7)
9	0.603 (7)	0.477 (5)	0.484 (6)	0.311 (1)	0.346 (2)	0.659 (8)	0.349 (3)	0.404 (4)
10	0.822 (8)	0.564 (3)	0.487 (1)	0.633 (4)	0.655 (5)	0.683 (6)	0.553 (2)	0.697 (7)
11	1.855 (3)	2.546 (6)	2.714 (7)	1.858 (4)	2.091 (5)	1.820 (2)	1.579 (1)	2.794 (8)
12	0.801 (4)	0.689 (3)	1.106 (8)	0.411 (1)	0.870 (6)	0.654 (2)	0.835 (5)	0.925 (7)
13	1.153 (3)	1.542 (6)	1.580 (7)	1.063 (2)	1.021 (1)	1.268 (4)	2.981 (8)	1.417 (5)
14	0.769 (4)	0.855 (7)	0.556 (2)	0.706 (3)	0.984 (8)	0.814 (6)	0.778 (5)	0.533 (1)
15	1.261 (4)	2.071 (8)	1.009 (1)	1.270 (5)	1.177 (3)	1.157 (2)	1.822 (7)	1.504 (6)
16	0.653 (3)	0.765 (7)	0.638 (2)	0.751 (6)	0.726 (4)	0.789 (8)	0.750 (5)	0.524 (1)
17	0.681 (6)	0.634 (4)	0.428 (1)	0.544 (3)	0.646 (5)	0.764 (8)	0.524 (2)	0.736 (7)
18	1.650 (5)	2.072 (8)	1.099 (1)	1.329 (2)	1.903 (7)	1.458 (4)	1.368 (3)	1.837 (6)
19	0.580 (1)	0.772 (2)	1.407 (6)	1.610 (8)	0.886 (3)	1.000 (5)	1.528 (7)	0.887 (4)
20	1.434 (7)	1.589 (8)	0.914 (3)	0.914 (4)	1.007 (5)	1.028 (6)	0.748 (1)	0.775 (2)
21	0.885 (5)	0.774 (1)	0.829 (3)	0.953 (7)	0.922 (6)	0.864 (4)	1.126 (8)	0.816 (2)
22	1.636 (4)	1.697 (5)	1.513 (3)	1.811 (8)	1.767 (6)	1.256 (1)	1.500 (2)	1.807 (7)
23	0.630 (2)	0.794 (8)	0.676 (4)	0.748 (6)	0.529 (1)	0.642 (3)	0.683 (5)	0.764 (7)
24	0.591 (2)	0.816 (7)	0.705 (3)	1.334 (8)	0.729 (6)	0.589 (1)	0.709 (4)	0.726 (5)
25	0.590 (5)	0.494 (3)	0.594 (6)	0.854 (8)	0.568 (4)	0.625 (7)	0.466 (2)	0.460 (1)
26	0.511 (7)	0.627 (8)	0.356 (2)	0.396 (3)	0.341 (1)	0.406 (4)	0.494 (6)	0.416 (5)
27	0.515 (1)	0.655 (6)	0.841 (7)	0.555 (3)	0.578 (5)	0.563 (4)	0.552 (2)	0.916 (8)
Average Rank:	3.96	5.61	4.25	4.11	4.11	4.96	4.07	4.93
Table S34. Ranking of FCN configurations Using Annular Curve Input at all stages of repair combined. Values are presented as mean leaflet MBD (rank). The rank was calculated across all FCN variants used on the same case (row) ranging from 1 (best) to 8 (worst). The bottom row shows the average rank across all cases for individual FCN variants. The best ranked FCN variant has the lowest average ra…
Case	FCN
	(Two-Phase) Ann-Res	(Four-Phase) Ann-Res	(Single-Phase) Ann-Res	(Two-Phase) Ann-Res	(CSP) Ann-Res	(Four-Phase) Ann-Res	(Single-Phase) Ann-Res	(CSP) Ann-Res
0	1.132 (5)	1.131 (4)	0.920 (1)	1.145 (6)	1.005 (3)	0.995 (2)	1.316 (8)	1.158 (7)
1	0.845 (5)	1.199 (8)	1.168 (7)	0.665 (3)	0.640 (1)	0.840 (4)	0.641 (2)	0.879 (6)
2	0.522 (3)	0.457 (1)	0.604 (5)	0.499 (2)	0.589 (4)	0.611 (7)	0.608 (6)	0.642 (8)
3	0.608 (2)	0.916 (8)	0.809 (5)	0.870 (7)	0.673 (4)	0.664 (3)	0.589 (1)	0.826 (6)
4	1.344 (7)	1.416 (8)	1.123 (4)	1.229 (5)	0.993 (1)	1.039 (3)	1.341 (6)	1.029 (2)
5	0.783 (8)	0.718 (7)	0.714 (6)	0.488 (3)	0.435 (1)	0.440 (2)	0.567 (5)	0.496 (4)
6	0.890 (8)	0.730 (5)	0.812 (7)	0.680 (4)	0.638 (3)	0.623 (2)	0.738 (6)	0.598 (1)
7	0.708 (5)	0.644 (4)	0.634 (3)	0.760 (8)	0.728 (6)	0.532 (1)	0.754 (7)	0.601 (2)
8	0.797 (6)	0.671 (5)	0.839 (7)	0.535 (2)	0.448 (1)	0.597 (4)	0.561 (3)	0.851 (8)
9	0.305 (4)	0.355 (5)	0.491 (8)	0.256 (1)	0.290 (2)	0.296 (3)	0.383 (6)	0.405 (7)
10	0.362 (1)	0.434 (3)	0.627 (8)	0.471 (6)	0.404 (2)	0.534 (7)	0.467 (5)	0.457 (4)
11	1.337 (3)	1.435 (5)	1.639 (7)	0.949 (1)	1.142 (2)	1.523 (6)	1.402 (4)	1.869 (8)
12	0.640 (7)	0.611 (6)	0.656 (8)	0.464 (3)	0.366 (1)	0.513 (4)	0.402 (2)	0.576 (5)
13	1.514 (7)	1.146 (5)	1.106 (3)	1.032 (2)	0.759 (1)	1.257 (6)	1.832 (8)	1.145 (4)
14	0.631 (6)	0.570 (5)	0.677 (8)	0.501 (1)	0.507 (2)	0.548 (3)	0.559 (4)	0.663 (7)
15	1.014 (8)	0.903 (6)	0.786 (3)	0.856 (5)	0.610 (1)	0.790 (4)	0.664 (2)	0.914 (7)
16	0.545 (4)	0.541 (3)	0.683 (6)	0.572 (5)	0.492 (2)	0.440 (1)	0.780 (8)	0.710 (7)
17	0.372 (2)	0.594 (4)	0.768 (8)	0.306 (1)	0.549 (3)	0.609 (5)	0.643 (7)	0.632 (6)
18	0.702 (4)	1.046 (6)	1.691 (8)	0.525 (2)	0.595 (3)	1.040 (5)	0.507 (1)	1.177 (7)
19	1.425 (8)	0.916 (6)	0.716 (3)	1.393 (7)	0.678 (2)	0.451 (1)	0.877 (5)	0.870 (4)
20	0.532 (2)	0.789 (5)	1.199 (8)	0.450 (1)	0.656 (3)	0.776 (4)	0.832 (7)	0.803 (6)
21	0.729 (3)	0.752 (4)	0.825 (5)	0.641 (1)	0.886 (7)	0.936 (8)	0.694 (2)	0.837 (6)
22	0.803 (1)	1.084 (3)	1.334 (5)	0.933 (2)	1.250 (4)	1.353 (7)	1.338 (6)	1.407 (8)
23	0.425 (2)	0.365 (1)	0.473 (5)	0.457 (3)	0.468 (4)	0.666 (8)	0.492 (6)	0.626 (7)
24	0.831 (6)	0.872 (7)	0.891 (8)	0.734 (4)	0.768 (5)	0.595 (2)	0.538 (1)	0.697 (3)
25	0.363 (4)	0.567 (7)	0.516 (5)	0.280 (1)	0.351 (3)	0.300 (2)	0.516 (6)	0.702 (8)
26	0.510 (7)	0.538 (8)	0.457 (6)	0.406 (4)	0.240 (1)	0.324 (3)	0.256 (2)	0.432 (5)
27	0.569 (4)	0.623 (6)	0.683 (7)	0.383 (1)	0.407 (2)	0.501 (3)	0.579 (5)	0.710 (8)
Average Rank:	4.71	5.18	5.86	3.25	2.64	3.93	4.68	5.75
Table S35. Ranking of FCN configurations Using The Commissural Landmarks only at all stages of repair combined.Values are presented as mean leaflet MBD (rank). The rank was calculated across all FCN variants used on the same case (row) ranging from 1 (best) to 8 (worst). The bottom row shows the average rank across all cases for individual FCN variants. The best ranked FCN variant has the lowest …
Case	FCN
	(Four-Phase) Com-Res	(Single-Phase) Com-Res	(Two-Phase) Com	(CSP) Com	(Four-Phase) Com	(Single-Phase) Com	(Two-Phase) Com-Res	(CSP) Com-Res
0	0.987 (6)	0.947 (4)	0.951 (5)	1.198 (8)	1.095 (7)	0.817 (1)	0.876 (2)	0.901 (3)
1	0.765 (3)	0.702 (2)	1.369 (8)	0.961 (7)	0.949 (6)	0.836 (4)	0.692 (1)	0.888 (5)
2	0.451 (2)	0.477 (3)	0.535 (6)	0.520 (5)	0.481 (4)	0.447 (1)	0.565 (8)	0.554 (7)
3	0.666 (4)	0.553 (1)	0.963 (8)	0.933 (7)	0.880 (6)	0.600 (3)	0.597 (2)	0.757 (5)
4	0.920 (8)	0.600 (3)	0.815 (6)	0.811 (5)	0.751 (4)	0.873 (7)	0.591 (2)	0.567 (1)
5	0.616 (4)	0.518 (1)	0.638 (5)	0.728 (8)	0.663 (6)	0.685 (7)	0.544 (2)	0.586 (3)
6	0.724 (3)	0.642 (1)	1.231 (8)	0.761 (4)	1.155 (7)	0.806 (6)	0.701 (2)	0.769 (5)
7	0.544 (6)	0.468 (1)	0.688 (8)	0.595 (7)	0.522 (4)	0.500 (3)	0.483 (2)	0.542 (5)
8	0.740 (6)	0.554 (1)	0.664 (4)	0.894 (8)	0.823 (7)	0.598 (3)	0.577 (2)	0.679 (5)
9	0.299 (7)	0.209 (1)	0.267 (5)	0.319 (8)	0.246 (3)	0.253 (4)	0.219 (2)	0.292 (6)
10	0.564 (4)	0.623 (7)	1.172 (8)	0.442 (2)	0.419 (1)	0.486 (3)	0.604 (6)	0.569 (5)
11	1.235 (5)	0.726 (1)	2.788 (8)	2.327 (7)	1.079 (4)	0.984 (3)	1.340 (6)	0.843 (2)
12	0.460 (3)	0.436 (2)	0.731 (7)	0.760 (8)	0.553 (5)	0.622 (6)	0.352 (1)	0.473 (4)
13	0.523 (1)	0.810 (6)	2.141 (8)	1.071 (7)	0.651 (4)	0.731 (5)	0.612 (3)	0.527 (2)
14	0.298 (4)	0.211 (1)	0.570 (8)	0.525 (7)	0.440 (5)	0.465 (6)	0.294 (3)	0.238 (2)
15	0.899 (2)	1.140 (5)	1.015 (4)	1.613 (8)	1.590 (7)	1.163 (6)	0.970 (3)	0.794 (1)
16	0.603 (6)	0.501 (2)	0.609 (7)	0.579 (5)	0.517 (3)	0.662 (8)	0.557 (4)	0.482 (1)
17	0.362 (3)	0.325 (2)	0.475 (5)	0.492 (7)	0.484 (6)	0.535 (8)	0.399 (4)	0.257 (1)
18	0.611 (4)	0.511 (2)	1.571 (8)	1.107 (7)	1.071 (6)	0.940 (5)	0.558 (3)	0.452 (1)
19	0.990 (8)	0.662 (5)	0.892 (7)	0.505 (1)	0.618 (4)	0.726 (6)	0.546 (3)	0.544 (2)
20	0.655 (6)	0.370 (1)	0.577 (5)	0.694 (8)	0.658 (7)	0.454 (4)	0.389 (2)	0.405 (3)
21	0.628 (3)	0.515 (1)	0.865 (7)	0.899 (8)	0.660 (4)	0.723 (6)	0.661 (5)	0.578 (2)
22	1.873 (8)	0.557 (1)	1.141 (6)	0.928 (5)	1.226 (7)	0.862 (4)	0.773 (3)	0.707 (2)
23	0.362 (3)	0.330 (2)	0.756 (8)	0.460 (6)	0.501 (7)	0.419 (5)	0.316 (1)	0.378 (4)
24	0.662 (5)	0.579 (3)	0.775 (8)	0.565 (2)	0.716 (7)	0.689 (6)	0.613 (4)	0.423 (1)
25	0.607 (7)	0.301 (1)	0.496 (6)	0.648 (8)	0.398 (4)	0.394 (3)	0.372 (2)	0.459 (5)
26	0.434 (5)	0.303 (1)	0.470 (7)	0.517 (8)	0.313 (2)	0.365 (4)	0.449 (6)	0.356 (3)
27	0.365 (6)	0.219 (1)	0.326 (4)	0.471 (8)	0.458 (7)	0.314 (3)	0.251 (2)	0.329 (5)
Average Rank:	4.71	2.21	6.57	6.39	5.14	4.64	3.07	3.25
Table S36. Ranking of FCN configurations Using Annular Curve Input and Commissural Landmarks at all stages of repair combined.Values are presented as mean leaflet MBD (rank). The rank was calculated across all FCN variants used on the same case (row) ranging from 1 (best) to 8 (worst). The bottom row shows the average rank across all cases for individual FCN variants. The best ranked FCN variant …
Case	FCN
	(Two-Phase) Ann-Com	(CSP) Ann-Com	(Four-Phase) Ann-Com	(Single-Phase) Ann-Com	(Two-Phase) Ann-Com-Res	(CSP) Ann-Com-Res	(Four-Phase) Ann-Com-Res	(Single-Phase) Ann-Com-Res
0	0.545 (5)	0.711 (6)	0.838 (7)	0.936 (8)	0.537 (4)	0.529 (3)	0.403 (2)	0.393 (1)
1	0.592 (5)	0.612 (7)	0.598 (6)	0.692 (8)	0.479 (4)	0.434 (2)	0.448 (3)	0.403 (1)
2	0.581 (6)	0.678 (8)	0.543 (5)	0.597 (7)	0.482 (1)	0.517 (3)	0.533 (4)	0.510 (2)
3	0.610 (6)	0.586 (5)	0.626 (7)	0.546 (4)	0.503 (2)	0.492 (1)	0.507 (3)	0.888 (8)
4	0.461 (1)	0.503 (4)	0.633 (6)	0.716 (8)	0.638 (7)	0.470 (2)	0.505 (5)	0.483 (3)
5	0.456 (4)	0.399 (1)	0.546 (7)	0.625 (8)	0.439 (3)	0.461 (5)	0.462 (6)	0.419 (2)
6	0.564 (6)	0.495 (5)	0.656 (7)	0.698 (8)	0.375 (2)	0.397 (3)	0.349 (1)	0.480 (4)
7	0.525 (8)	0.441 (5)	0.520 (7)	0.485 (6)	0.395 (3)	0.366 (1)	0.393 (2)	0.437 (4)
8	0.602 (5)	0.699 (7)	0.607 (6)	0.770 (8)	0.506 (4)	0.422 (2)	0.442 (3)	0.391 (1)
9	0.241 (6)	0.217 (2)	0.312 (7)	0.314 (8)	0.225 (3)	0.225 (4)	0.185 (1)	0.235 (5)
10	0.316 (1)	0.389 (5)	0.380 (4)	0.375 (3)	0.484 (8)	0.340 (2)	0.412 (6)	0.431 (7)
11	1.061 (5)	1.010 (4)	1.158 (6)	1.171 (7)	1.260 (8)	0.756 (2)	0.683 (1)	1.003 (3)
12	0.383 (5)	0.582 (8)	0.402 (6)	0.505 (7)	0.241 (1)	0.303 (3)	0.335 (4)	0.272 (2)
13	0.605 (5)	0.553 (4)	0.698 (6)	0.880 (7)	1.551 (8)	0.415 (1)	0.457 (2)	0.545 (3)
14	0.344 (5)	0.352 (6)	0.410 (7)	0.424 (8)	0.308 (4)	0.199 (1)	0.201 (2)	0.202 (3)
15	0.826 (8)	0.718 (6)	0.735 (7)	0.664 (5)	0.627 (3)	0.543 (1)	0.609 (2)	0.630 (4)
16	0.491 (5)	0.475 (4)	0.387 (1)	0.585 (8)	0.521 (7)	0.497 (6)	0.449 (2)	0.460 (3)
17	0.292 (4)	0.284 (2)	0.324 (8)	0.296 (5)	0.291 (3)	0.227 (1)	0.299 (6)	0.318 (7)
18	0.666 (6)	0.541 (5)	0.781 (8)	0.728 (7)	0.327 (3)	0.298 (1)	0.316 (2)	0.362 (4)
19	0.534 (6)	0.756 (8)	0.627 (7)	0.502 (5)	0.396 (3)	0.436 (4)	0.341 (2)	0.326 (1)
20	0.391 (6)	0.408 (7)	0.379 (5)	0.424 (8)	0.334 (3)	0.341 (4)	0.248 (1)	0.285 (2)
21	0.434 (3)	0.435 (4)	0.568 (8)	0.547 (7)	0.483 (6)	0.301 (1)	0.436 (5)	0.365 (2)
22	0.576 (5)	0.640 (6)	0.760 (8)	0.650 (7)	0.467 (3)	0.403 (2)	0.489 (4)	0.370 (1)
23	0.245 (2)	0.353 (6)	0.472 (8)	0.370 (7)	0.278 (3)	0.337 (5)	0.293 (4)	0.212 (1)
24	0.671 (8)	0.509 (5)	0.652 (7)	0.551 (6)	0.408 (4)	0.341 (2)	0.384 (3)	0.305 (1)
25	0.369 (7)	0.304 (5)	0.329 (6)	0.565 (8)	0.278 (4)	0.226 (2)	0.231 (3)	0.226 (1)
26	0.376 (8)	0.303 (6)	0.253 (5)	0.321 (7)	0.202 (1)	0.226 (4)	0.219 (3)	0.210 (2)
27	0.206 (3)	0.212 (5)	0.372 (7)	0.446 (8)	0.211 (4)	0.183 (1)	0.235 (6)	0.206 (2)
Average Rank:	5.14	5.21	6.39	6.89	3.89	2.46	3.14	2.86
